# Supplementary material for: Molecular dynamics simulations on fullerene surfactants with different charges at the air–water interface
Source: Royal Society of Chemistry journal article supplement (doi:10.1039/d0cp01979h), 2020-01-01
Supplement: d0cp01979h1.pdf [file d0cp01979h1.pdf]

Supporting Information for

**Molecular dynamics simulations on fullerene surfactants with different charges  
at the air-water interface**

Yunzhi Li<sup>a,1</sup>, Yaoyao Wei<sup>a,1</sup>, Xia Leng<sup>a</sup>, Guokui Liu<sup>a,\*</sup>, Qiying Xia<sup>a,\*</sup>, Honglei  
Wang<sup>b,\*</sup>

<sup>a</sup> School of Chemistry and Chemical Engineering, Linyi University, Linyi 276000, China

<sup>b</sup> Beijing Kein Research Center for Natural Sciences, Beijing 100022, China

---

\* Corresponding authors.

E-mail addresses: [liuguokui@lyu.edu.cn](mailto:liuguokui@lyu.edu.cn) (G. Liu), [xiaqiying@lyu.edu.cn](mailto:xiaqiying@lyu.edu.cn) (Q. Xia), [wanghl@qibebt.ac.cn](mailto:wanghl@qibebt.ac.cn) (H. Wang)

<sup>1</sup> Both authors contribute equally to this work.

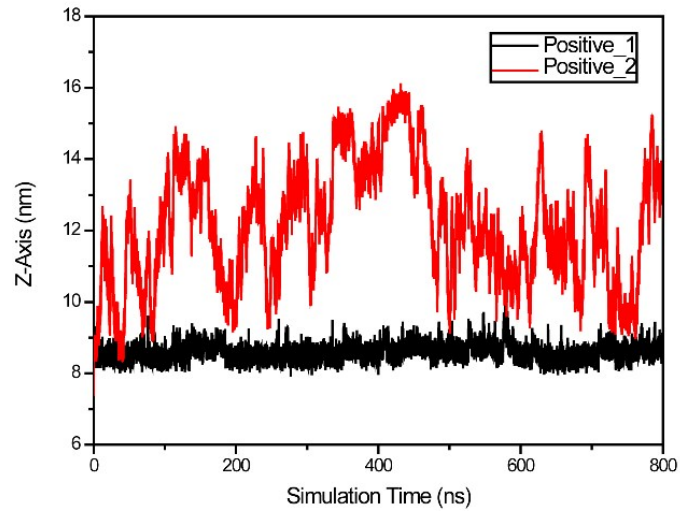

Fig. S1 The Z-direction location of fullerene surfactants COM with the time evolution of 800 ns.

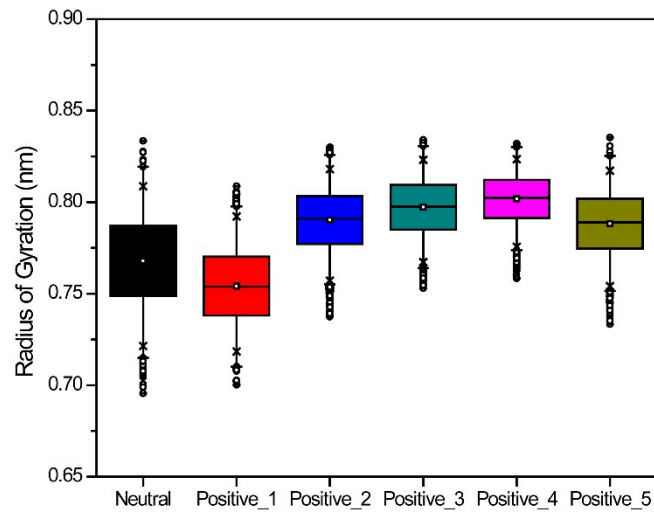

Fig. S2 The radius of gyration for different surfactants.

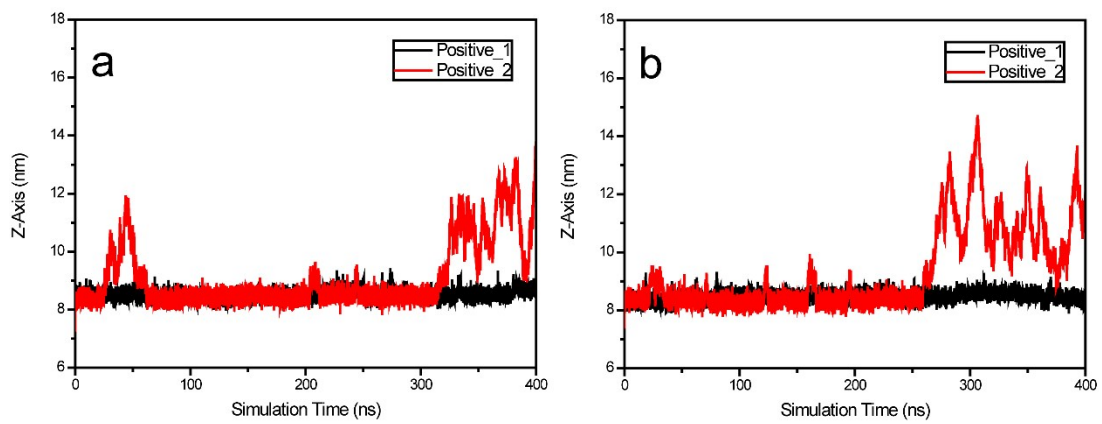

Fig. S3 The z-location of Positive\_1 and Positive\_2 surfactants COM with the time evolution using different water models (a: TIP4P; b: TIP5P).

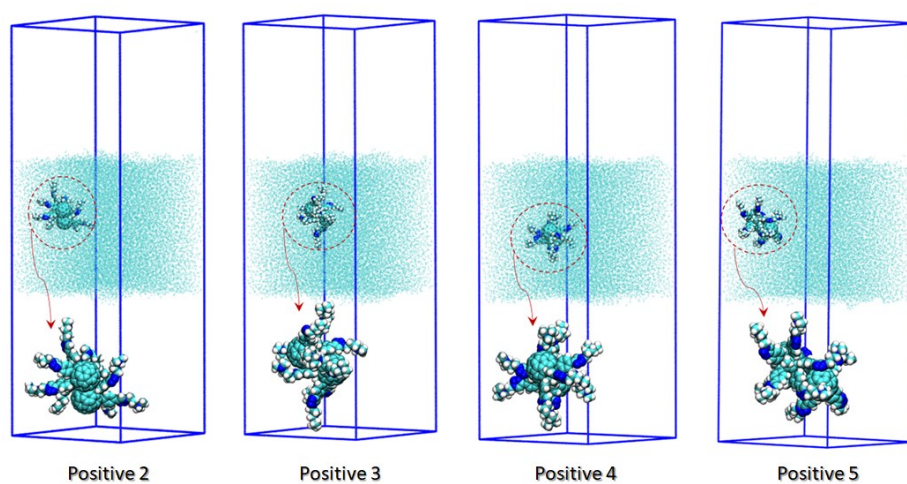

Fig. S4 Snapshots of aggregation structures for Positive\_2, Positive\_3, Positive\_4 and Positive\_5.

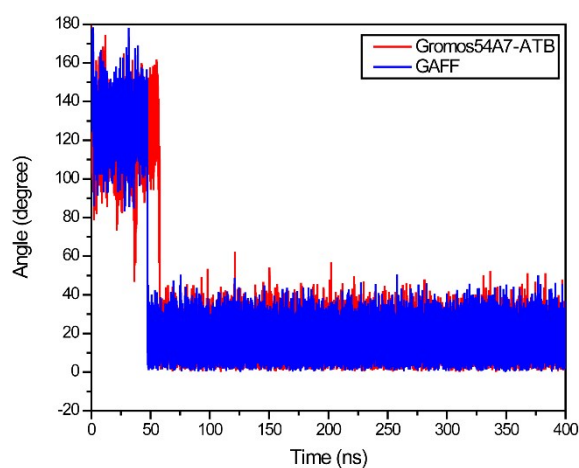

Fig. S5 The angle distribution of Neutral with different force fields (GAFF stands for the generalized Amber force field, and Gromos54A7-ATB stands for the force field generated with the Automated Topology Builder).
